1 **Diversity of Antibiotic Resistance genes and Transfer Elements-Quantitative Monitoring**  
2 **(DARTE-QM): a method for detection of antimicrobial resistance in environmental samples**

3

4 **Schuyler D. Smith**

5 *Bioinformatics and Computational Biology Program, Iowa State University, Ames, IA*

6 *Department of Agricultural and Biosystems Engineering, Iowa State University, Ames, IA*

7 Email: [sdsmith@iastate.edu](mailto:sdsmith@iastate.edu)

8

9 **Jinlyung Choi**

10 *Department of Agricultural and Biosystems Engineering, Iowa State University, Ames, IA*

11 Email: [genase23@gmail.com](mailto:genase23@gmail.com)

12

13 **Nicole Ricker**

14 Previous: *Department of Agricultural and Biosystems Engineering, Iowa State University, Ames, IA;*

15 *Food Safety and Enteric Pathogens Research Unit, ARS-USDA National Animal Disease Center, Ames,*

16 *IA*

17 Current: *Department of Pathobiology, Ontario Veterinary College, University of Guelph, Guelph, ON,*

18 *Canada*

19 Email: [nricker@uoguelph.ca](mailto:nricker@uoguelph.ca)

20

21 **Fan Yang**

22 *Department of Agricultural and Biosystems Engineering, Iowa State University, Ames, IA*

23 Email: [fan.michelle.yang@gmail.com](mailto:fan.michelle.yang@gmail.com)

24

25 **Shannon Hinsaleasure**

26 *Department of Biology, Grinnell College, Grinnell, IA*

27 Email: hinsa@grinnell.edu

28

29 **Michelle Soupir**

30 *Department of Agricultural and Biosystems Engineering, Iowa State University, Ames, IA*

31 Email: msoupir@iastate.edu

32

33 **Heather Allen**

34 *Food Safety and Enteric Pathogens Research Unit, ARS-USDA National Animal Disease Center, Ames,*

35 *IA*

36

37 **Adina Howe\***

38 *Bioinformatics and Computational Biology Program, Iowa State University, Ames, IA*

39 *Department of Agricultural and Biosystems Engineering, Iowa State University, Ames, IA*

40 Email: adina@iastate.edu

41

42 ABSTRACT

43

44 Effective monitoring of antibiotic resistance genes and their dissemination in environmental  
45 ecosystems has been hindered by the cost and efficiency of methods available for the task. We  
46 developed a method entitled the Diversity of Antibiotic Resistance genes and Transfer Elements-  
47 Quantitative Monitoring (DARTE-QM), a system implementing high-throughput sequencing to  
48 simultaneously sequence thousands of antibiotic resistant genes representing a full-spectrum of  
49 antibiotic resistance classes commonly seen in environmental systems. In this study, we demonstrated  
50 DARTE-QM by screening 662 antibiotic resistance genes within environmental samples originated  
51 from manure, soil, and animal feces, in addition to a mock-community used as a control to test  
52 performance. DARTE-QM offers a new approach to studying antibiotic resistance in environmental  
53 microbiomes, showing advantages in efficiency and the ability to scale for many samples. This method  
54 provides a means of data acquisition that will alleviate the obstacles that many researchers in this area  
55 currently face.

56

57

58 INTRODUCTION

59

60 The global spread of organisms possessing antimicrobial resistance (AMR), and their associated  
61 antibiotic resistant genes (ARGs), is posing an increasing threat to the health of both humans and  
62 animals alike<sup>1-3</sup>. Characterization of the presence and abundance of ARGs, i.e. the resistome, in  
63 environmental microbiome samples has stood as a major challenge for researchers monitoring these  
64 events<sup>4</sup>. Such studies have been impeded by the broad diversity of the genes, their low presence in most  
65 natural environments, the difficulty of extracting DNA from microbes in those environments, and their

66 association with mobile genetic elements accounting for approximately one-quarter of the genetic  
67 material in these microbiomes<sup>5</sup>.

68

69 The genetic diversity of ARGs has made targeted sequencing approaches non-trivial and has led to the  
70 application of whole-genome shotgun metagenomic methods for the characterization resistomes<sup>6</sup>. This  
71 approach is dependent on the availability of a gene reference database to classify reads as ARGs  
72 sequences but does not require *a priori* knowledge of which genes constitute the resistome being  
73 investigated<sup>7</sup>. Despite being effective for the task, the cost per sample of employing metagenomic  
74 methods to elucidate resistomes often inhibits studies from scaling. Shotgun sequencing must  
75 indiscriminately sequence a genome, and often the resistome comprises only a fraction of a percent of  
76 the entire metagenome. Therefore, it is often the case that only a minute subset of the sequencing-reads  
77 produced through this method will be informative to resistomes, and ARGs are either underrepresented  
78 or undetected<sup>8</sup>, as sufficient sequencing depth and coverage is difficult to achieve.

79

80 In the effort to find more efficient means for sequencing ARGs, a method of implementing bait-and-  
81 capture system to identify ARG targets has been developed<sup>9</sup>. This approach uses streptavidin-coated  
82 magnetic beads to capture 80-mer bait sequences to target genes of interest. The bait-and-capture  
83 method has been well-suited for the characterization of low- and high-abundance ARGs and has  
84 demonstrated the ability to differentiate resistomes from different sample sources<sup>10</sup>. Another method of  
85 targeted gene sequencing used for ARG characterization involves custom primers for performing a  
86 PCR-based amplicon library preparation. This type of sequencing is used extensively in microbiome  
87 studies for community profiling via bacterial 16S rRNA genes and combines barcoded adapters to  
88 differentiate hundreds of samples pooled in a single library preparation<sup>11</sup>. It has previously been limited  
89 in the number of primers that could be incorporated for a single library, but a more recent version of

90 amplicon library preparation for multiplexed primers now exists and has been implemented for  
91 biomarker detection in clinical studies<sup>12-15</sup>.

92

93 Our study demonstrates the first usage of this multiplexed amplicon library preparation for the  
94 detection of ARGs in environmental samples. We have termed our method of implementing this  
95 technology Diversity of Antibiotic Resistance genes and Transfer Elements-Quantitative Monitoring  
96 (DARTE-QM). Our study was designed to demonstrate that DARTE-QM offers practical application to  
97 ARG screening through its ability to simultaneously detect and quantify hundreds of ARGs residing in  
98 samples from various environments and that it can achieve high accuracy and sensitivity identifying  
99 ARG targets.

100

## 101 RESULTS

102

103 **Design of primers and samples.** DARTE-QM employed 796 primer pairs designed to target 67  
104 antibiotic resistant families and 662 ARGs, as well as a synthetic oligonucleotide reference sequence  
105 and the V4 region of the 16S rRNA gene, in a multiplexed amplicon library preparation (Supp. Table  
106 1, Supp. Table 2). Subsequent paired-end sequencing of 150 base pair reads was conducted using the  
107 Illumina MiSeq platform (USDA, Ames, IA). To evaluate the results of DARTE-QM against a  
108 reference, we constructed a mock-community microbiome comprised of DNA extracted from 20  
109 isolates (Supp. Table 3) with completed genome sequences (Dataset 1). For each of the mock-  
110 community libraries, we included varying concentrations of a synthetic oligonucleotide reference  
111 sequence to evaluate accuracy of quantification. We also examined how DARTE-QM was able to  
112 characterize true environmental resistomes associated with manure, swine fecal, and agricultural soil  
113 samples (Supp. Table 4).

114

115 **Evaluation of DARTE-QM sequencing products.** The sequencing data produced via DARTE-QM is  
116 unique in its high level of heterogeneity, as compared to traditional amplicon data generated from a  
117 singular DNA-primer (e.g., 16S SSU rRNA). Given numerous and diverse gene targets in the  
118 sequencing library, processing of DARTE-QM data required amendment of the traditional microbiome  
119 analysis pipelines (Figure 1). After quality control and processing, 16 of the 18 samples from the mock-  
120 community were retained for downstream analysis (2 samples removed for less than 5,000 reads  
121 passing quality filters). Quality filtering also resulted in the removal of 38 of the 61 environmental  
122 samples due to sequencing coverage below 5000 reads, likely caused by PCR inhibitors common of  
123 manure and soil samples<sup>16-18</sup>, leaving 39 samples in total to be used in the evaluation of DARTE-QM.  
124 The 16 mock-community samples yielded a mean of 192,415 reads per sample, and a mean of 44,440  
125 reads able to be aligned to ARG references (Supp. Table 5). In our environmental samples, across all  
126 sources, we observed a mean of 170,775 reads and a mean of 19,138 reads aligned to ARG references  
127 per sample.

128

129 **DARTE-QM successfully amplified targeted genes with high accuracy and sensitivity.** Reads from  
130 each sample were demultiplexed by primer, and each read was subsequently classified as either true  
131 positive (TP), false positive (FP), false negative (FN), or true negative (TN). This classification was  
132 based on alignment to the ARG reference database, where reads were deemed to be TP when both the  
133 intended primer target and read sequence aligned to the same gene; FP when the primer target and the  
134 read sequence did not agree; FN when no primer was found but the read sequence was able to be  
135 aligned to a reference ARG; and TN reads were assigned as all reads within a sample assigned as TP  
136 outside of the primer in question, i.e., all reads that were correctly identified as not being the targeted  
137 read.

138 Success for DARTE-QM was evaluated on three metrics: sensitivity ( $TP/[TP + FN]$ ), specificity  
139 ( $TN/[TN + FP]$ ), and accuracy ( $[TP + TN]/[TP + FN + TN + FP]$ ) for each gene target (i.e., primer) and  
140 each sample (Supp. Table 6). From the 662 ARGs targeted by DARTE-QM, 235 (~35%) were identi-  
141 fied in our samples. The mean sensitivity for all primers was found to be 99.6%. The mean specificity  
142 and mean accuracy were found to be > 99.9% and 99.6%, respectively, suggesting that the primers in  
143 DARTE-QM were successful in amplifying their intended target genes.

144

145 We also observed a substantial number of reads in our sequencing libraries that had primers located on  
146 the 5' end of the sequences but were unable to be aligned to any of our reference ARGs nor any posi-  
147 tion in the mock-community genomes. Inspection of a subset of these reads found that they contained  
148 repeated poly-A and poly-T elements. These reads were observed as unique sequences within the da-  
149 taset, implying little or no biological pattern. These artifacts accounted for 47% of all reads in samples  
150 which passed quality controls. However, in samples that failed to pass quality filters, these sequences  
151 accounted for 85% of reads. Sample source appeared to be a significant, yet likely confounded, factor  
152 in the production of these artifacts. Sequencing of samples from the mock-community had significantly  
153 lower counts for artifact reads as compared to environmental samples (soil-A,  $p = 0.038$ ; manure-A +  
154 soil-A,  $p = 0.035$ ; swine fecal,  $p < 0.001$ , pairwise-Wilcoxon). Across all samples, an inverse linear re-  
155 lationship ( $R^2 = 0.68$ ) (Supp. Figure 1) was observed between the number of reads which had a primer  
156 identified and the percentage of those reads that were artifacts.

157

158 **DARTE-QM was able to consistently identify presence and distribution of ARGs.** Construction of  
159 the mock-community from DNA sourced from fully-sequenced genomes allowed for comparison of a  
160 theoretical profile to our experimental observations of ARGs in these samples. In the combined  
161 genomes of the mock-community, ARGs comprised 0.03% (56 ARG targets) of the total genome by

162 base pair count. DARTE-QM was able to produce 55 of those 56 ARGs found in the mock-community  
163 reference genomes, consistently identifying them across all 16 samples (Figure 2). Particular resistance  
164 families that were not successfully captured by DARTE-QM included those associated with the *acrA*  
165 subunit of multidrug efflux pump systems, as well as genes encoding for chloramphenicol resistance  
166 (e.g., *catA*). While overall, target relative abundances were observed to be similar compared to  
167 theoretical, the quantification of particular ARGs, such as transposon-associated *lnuC* conferring  
168 resistance to lincomycin, were found in higher abundance by DARTE-QM, as others such as *mecA*  
169 conferring methicillin-resistance, were found to be underrepresented. With regard to the synthetic  
170 oligonucleotide, there was a strong correlation observed reads (Supp Figure 2,  $R^2 = 0.91$ ) between the  
171 read abundance produced by DARTE-QM and the experimental concentration.

172

173 **DARTE-QM differentiated resistomes between environmental sources.** DARTE-QM detected 240  
174 ARG targets across all samples in this study (including 121 in Soil-A, 172 in Soil-B, 182 in Soil-C, 202  
175 in Swine Manure-A, 129 in Swine Manure-B, 178 in the Swine Fecal samples, and 156 in the mock-  
176 community, Supp. Table 4). Distinctions in the composition of resistomes were detected, not just from  
177 the presence of unique ARG targets but also from the abundance of the ARGs that composed the  
178 resistomes from each environment (Figure 3a). Ordination, via principal coordinate analysis based on  
179 Bray-Curtis distances of observed ARGs targets, showed clear separation of environmental sources,  
180 with the first two eigenvalues accounting for nearly 80% of the total variation (Figure 3b).

181 Permutational multivariate analysis of variance (PERMANOVA) was used as a non-parametric  
182 multivariate statistical test to compare the variation of samples and environmental source. The results  
183 of the PERMANOVA test corroborated the apparent findings of the PCoA, and environmental sources  
184 were associated with a significant ( $F=11.45$ ,  $R^2=0.70$ ,  $p < 0.001$ ) portion of variation observed in the  
185 resistome profiles. DARTE-QM identified specific ARG patterns which distinguished resistomes



186 sourced from different environmental samples, the most notable of which was within swine fecal  
187 samples where a distinctive presence of genes related to lincosamide and aminoglycoside resistance  
188 were observed. In the soils, with varied field management histories of swine and bovine manure  
189 amendment (soils B and C), we observed distinct characteristics of resistomes as well. Bovine manure-  
190 associated soils were found to be enriched with genes associated with resistance to aminoglycosides  
191 and sulfanomides, whereas the swine manure-amended soils were replete with aminoglycoside,  
192 lincosamides, and erythromycin-resistance related genes.

193

194 **DARTE-QM produced results with comparable resolution to that of metagenomes.** Soil-column  
195 samples used in this study had been previously characterized through metagenome sequencing<sup>19</sup> (NCBI  
196 SRA Study SRP193066). DNA from the same sources were used for sequencing with DARTE-QM  
197 study for comparison of the two methods. Metagenomes from the soil samples had an average of 241  
198 ARG reads and were excluded from analysis; DARTE-QM returned a mean abundance of 5,839 ARG  
199 reads in those same samples. Four swine-manure samples from the metagenome study yielded a mean  
200 ARG abundance of 76,226 reads, and the 12 manure treated soil samples yielded an average of 7,377  
201 ARG reads. DARTE-QM produced mean abundances of 32,678 and 13,488 ARG reads in the same  
202 samples.

203

204 Relative abundance of ARG classes showed similar profiles for swine-manure from both technologies.  
205 DARTE-QM reads were classified into 99 ARG families and metagenome reads to 56 ARG families.  
206 From those, 39 ARG families were shared between the two methods and accounted for 89% and 84%  
207 of metagenome and DARTE-QM ARG families, respectively (Figure 4). In the manure-treated soil  
208 samples DARTE-QM identified 99 ARG families and metagenomes 92, sharing 50 of those that ac-  
209 counted for 90% and 83%, respectively. For identifying diverse ARGs, DARTE-QM is disadvantaged

210 by being a targeted method. For example, the metagenomes had a noticeable presence of genes from  
211 the AMR gene families for resistance-nodulation-cell division antibiotic efflux pump (*Mux* and *Mex*  
212 ARG Classes), which were not targeted by DARTE-QM. A direct comparison of both approaches con-  
213 strains the metagenomes to those targeted by the primers of DARTE-QM (Figure 4b). In this compari-  
214 son, metagenomes identified 48 ARG families in the swine manure samples and 65 in the manure-  
215 treated soils. Diversity measurements using the Shannon-Weiner Index of ARG classes showed similar  
216 values between the methods with DARTE-QM having  $H = 2.95$  in swine-manure samples and  $H = 2.87$   
217 in manure-treated soil samples, while metagenomes had  $H = 2.92$  in swine-manure samples and  $H =$   
218 2.84 in the manure-treated soils.

219

220 **DARTE-QM can distinguish gene variants through sequencing.** Two high-abundance genes, *erm35*  
221 encoding for the macrolide-lincosamide-streptogramin and *tetM* for tetracycline resistance, were  
222 selected for variant analysis. DARTE-QM reads classified as either of these genes were clustered at  
223 97% nucleotide identity, resulting in three clusters for *erm35* and five clusters for *tetM*. Each cluster  
224 contained a minimum of ten unique sequences. The primary *erm35* cluster contained 4,785 reads  
225 (Supp. Table 6, Supp. Figure 3a). The other two *erm35* clusters were defined by 5 to 10 base pair  
226 variations within the associated 13 and 18 reads. Similarly, from a total of 24,653 reads classified as  
227 *tetM*, 96% defined the primary cluster, which was identical to one of the 6 *tetM* primer targets. Four of  
228 the other clusters, which contained between 32 and 676 reads, were defined by 9 and 24 base pair  
229 variations (Supp. Table 6, Supp Figure 3b). Bacterial hosts associated with the observed *erm35* variants  
230 were solely associated with *Bacteroides coprosuis* and *Bacteroides spp.* and is consistent with the  
231 limited diversity of known isolates carrying this gene. In contrast, the sequences associated with *tetM*  
232 clusters are known to originate in various taxa. The largest *tetM* cluster was found to be highly  
233 conserved across a broad diversity of Gram-positive and some Gram-negative isolates. In comparison,

234 the *tetM* cluster containing 676 reads, was primarily associated with plasmids found in *E. coli* and  
235 *Salmonella*. The lower abundance of this cluster in the DARTE-QM data is consistent with the low  
236 relative abundance of Enterobacterales in swine gut-associated samples<sup>20</sup>. Similarly, the other *tetM*  
237 clusters were associated with *Streptococcus* strains and found in a lower diversity of taxa compared  
238 with the largest cluster.

239

## 240 DISCUSSION

241

242 DARTE-QM was conceptualized as an approach towards more efficient characterization of ARGs  
243 found in microbiomes. Specifically, we developed DARTE-QM to address the cost limitations of  
244 metagenomic approaches for ARG monitoring in environmental samples, where ARGs of interest often  
245 require significant sequencing depth and coverage. One of the major goals was to drastically scale the  
246 number of samples able to be evaluated by leveraging the high-throughput capabilities of barcode-  
247 multiplexing combined with amplicon library preparation. Similar to other amplicon-sequencing  
248 platforms, the costs of DARTE-QM are driven by the synthesis of primers and the price of sequencing.  
249 As DARTE-QM targets specified genes for amplification, it is able to enrich and detect ARGs that are  
250 present in low abundance, which is often a barrier for shotgun metagenomics. The number of samples  
251 that can be processed using DARTE-QM is limited by the number of unique barcode sequence  
252 adapters, the sequencing depth required per sample, and the number of gene targets. At the time of this  
253 study, the number of gene targets was constrained by the TruSeq platform, which currently supports  
254 1,536 primers and 96 barcoded samples.

255

256 The aim of this study was to demonstrate the efficacy of DARTE-QM for characterizing ARGs from  
257 environmental samples. Our results showed that DARTE-QM had success detecting the presence of

258 hundreds of diverse ARGs across soil, manure, water, and our mock-community samples. While  
259 DARTE-QM was designed with the capacity to identify diverse ARG targets, our assessment was  
260 limited by ARGs contained in our samples. We used DNA extracted from isolates with known genomes  
261 and ARG distributions to evaluate the sensitivity and accuracy of DARTE-QM. We observed strong  
262 performance for detecting ARGs in our mock-community, having 98% of ARGs detected with high  
263 sensitivity and specificity. There was evidence of DARTE-QM's ability to quantify ARG presence with  
264 the correlation of abundance to varying concentrations of our synthetic oligonucleotide reference in the  
265 mock-community samples. Those results, though not a perfect correlation ( $r^2 = 0.91$ ), illustrate that  
266 DARTE-QM is affected more by the amount of DNA available for the primer than by the competition  
267 between primers to find targets. Finally, comparisons to metagenomes suggested that DARTE-QM  
268 could detect similar measures of diversity of ARGs from samples. While the distributions of ARGs  
269 within the resistomes varied between DARTE-QM and metagenome resistomes, the differences  
270 between environmental sources could be distinguished, and broad patterns of resistance classes were  
271 similar. Combined, these results confirm that the primers used for DARTE-QM successfully amplified  
272 ARGs despite the potential for interference when simultaneously amplifying multiple gene targets in  
273 uniform conditions.

274

275 In cases where DARTE-QM abundances varied the most from expected, the gene targets were often  
276 associated with plasmids and other mobile elements. Multiple copies of these genes may exist per cell  
277 and result in the underestimation of these genes. For instance, *aph3-ib*, *aph6-id* and *sul2* are found on  
278 the same IncQ plasmid. This is a likely reason for the results of much higher observed copy numbers  
279 than other ARGs, as well as the theoretical estimate. The IncQ plasmid has been reported to have  
280 anywhere between 10 to 16 copies per cell.<sup>21</sup> The gene *aph(3')-IIa*, is located on an IncI2 plasmid,  
281 which conversely is a low copy number plasmid<sup>22</sup>, and is consistent with our results. The optimization

282 of future versions of this platform for specific gene targets is possible. In the case of plasmid-associated  
283 genes or genes for which amplification failed, PCR conditions could be varied for optimal  
284 amplification and specific gene standards could be included for absolute quantification. Further, it is  
285 possible to select primers for DARTE-QM to target specific resistance classes, rather than the broad  
286 array of targets demonstrated in this study.

287

288 A limitation of DARTE-QM is the presence of biased PCR amplification and associated amplicon  
289 artifacts. These sequencing artifacts were observed in all samples in this study and could be  
290 distinguished by the presence of a primer with an untargeted sequence. While these genes could be  
291 non-specific amplification of primers targeting other biological genes, the presence of poly-A and poly-  
292 T sequence patterns, like those seen in single cell amplification<sup>23</sup>, along with their majority singleton  
293 presence, suggested that they were sequencing artifacts. While these artifacts present an impediment for  
294 leveraging the sequencing coverage of DARTE-QM, we found that with at least 25,000 reads per  
295 sample, we could identify 90% of the ARGs present in mock-community samples. These sequencing  
296 artifacts also seemed to be produced by particular primers and in samples from specific environments,  
297 suggesting opportunities for optimization in future development of DARTE-QM. For instance, the  
298 primers targeting vancomycin-associated ARGs produced large number of artifact reads, and no  
299 vancomycin ARGs were expected in any of our samples. Similarly, many of the samples that produced  
300 the highest percentage of reads as artifacts were from soils, a medium known to have PCR inhibitors<sup>24</sup>.  
301 In samples where there was high-quality DNA and lower diversity (e.g., mock-community samples), it  
302 did not appear that the artifacts obstructed the production of true- positive reads. For screening of a  
303 broad range of diverse environments, artifacts are easily filtered through target alignment and  
304 classification. Future studies aimed at improving the sequencing library preparation protocols for

305 sample types or ineffective primers will continue to improve the platform based on the knowledge  
306 gained.

307

308 The most beneficial aspect of DARTE-QM to improving microbiome ARG monitoring is its ability to  
309 detect ARGs at costs that will allow hundreds of samples to be screened simultaneously. A current  
310 challenge to antimicrobial resistance monitoring is that characterizing broad indicators are expensive,  
311 and thus it is difficult to standardize studies for monitoring. DARTE-QM is a complement to existing  
312 approaches to characterize ARGs. We envision an optimal system whereby the most relevant ARGs in a  
313 study can be detected with less bias using metagenome sequencing, and these ARGs can subsequently  
314 be targeted for numerous samples using DARTE-QM. The sequencing from DARTE-QM can then  
315 provide information on the distribution of ARGs, as well as sequence variants, in a systematic fashion,  
316 even if in low abundance.

317

318 DARTE-QM is the first demonstration of simultaneous library preparation and subsequent sequencing  
319 of hundreds of unique gene targets from environmental DNA. Here, we demonstrated this application  
320 for the characterization of ARGs and associated resistomes in environmental samples, however,  
321 DARTE-QM presents the opportunity to apply this approach towards gaining sequencing information  
322 for other diverse functional genes as well. This platform is particularly suited for studies in which  
323 genes of interest are numerous and well-defined, and where sequencing information from these genes  
324 would provide benefits to understanding biological operations (e.g., point mutations or association with  
325 sequences with host information). The ability to affordably scale for numerous genes and samples  
326 provides a much-needed resource for not only the field of antimicrobial resistance but for researchers  
327 interested in scaling functional gene characterization. Finally, we recognize that this is the first  
328 evaluation of DARTE-QM and that there are significant opportunities to further develop this approach

329 for more targeted study. Given the simultaneous amplification of primers in DARTE-QM, we expect  
330 that the more specific the gene targets, the more optimized the library preparation can be for reliable  
331 quantification.

332

333

#### 334 DATA AVAILABILITY

335 Sequence files, sample metadata, and the genome sequence for the mock-community member  
336 sequenced by the USDA facility in Ames, IA, can be found through FileShare this link

337 <https://doi.org/10.25380/iastate.14390342>

338

339 Alternatively, all metadata and mock genomes used in the study are available through the same  
340 repository as the code for analysis.

341

342

#### 343 CODE AVAILABILITY

344

345 All code used for processing and analysis is open-source and can be found at

346 <https://schuyler-smith.github.io/DARTE-QM/>

347

#### 348 ONLINE METHODS

349

#### 350 **Sequencing Targets and Primer Design**

351

352 Antibiotic resistance gene (ARG) targets for primer design were chosen and aggregated from two  
353 sources. There were 2,472 sequences were obtained from the ResFinder database (version 3.2,  
354 November, 2016)<sup>25</sup>, associated with 67 antibiotic resistance families. ResFinder was selected on  
355 account of its manual curation of genes associated with acquired antibiotic resistance. An additional  
356 409 ARG-associated sequences chosen as well, which had previously demonstrated high prevalence in  
357 animal agriculture<sup>19</sup>. To abide with the limitation of the number of allowed primers with the Illumina  
358 TruSeq library preparation, later described, the conglomerate of the chosen sequences was ultimately  
359 curated to representative sequences that targeted genes deemed of most interest to antibiotic resistance  
360 in agriculture. A single 300 bp synthetic oligonucleotide sequence was designed for use as a reference  
361 (reference target gene in Supp. Table 1). The synthetic oligonucleotide was designed with no biological  
362 context to ensure that it would not interfere with any ARG detection, save for appropriate restriction  
363 sites that were added to allow for insertion into a pUC19 cloning vector. The sequence was compared  
364 to the entirety of the NCBI Genbank database and was confirmed to share no significant similarity to  
365 any existing records. Lastly, we included 25 sequences based on those used by the Earth Microbiome  
366 Project<sup>26</sup> to target the V4 variable region of the 16S rRNA gene.

367

368 The goal of primer design was to target the maximum number of our chosen sequences, with the  
369 highest specificity, staying within the set limit of 1,536 primers for the library preparation. Primers  
370 were designed using the Ribosomal Database Project's EcoFunPrimer software:<sup>27</sup> product minimum  
371 length = 220, product maximum length = 330, Oligo minimum size = 22, oligo maximum size = 30,  
372 maximum mismatch = 0, temperature minimum = 55, temperature maximum = 63, hair-pin max = 24,  
373 homo-max = 35, assaymax = 30, degenmax = 6, noTEendfileter = T, nopoly3GCfilter = T, polyrunfilter  
374 = 4, GCfilter min = 0.15 GCfilter max = 0.8. This produced 1,340 primers (Supp. Table 1) to target the  
375 ARG associated sequences, which accounted for 2,184 sequences (88.3%) from those selected (Supp.



376 Table 2). Two primers were created for the synthetic oligonucleotide, and 30 were included for  
377 targeting all degeneracies of the 25 16S rRNA sequences. In total, DARTE-QM used 1,372 primers  
378 (668 forward-primers, 704 reverse-primers) for 796 primer pairs to be used with Illumina's TruSeq  
379 Custom Amplicon Low Input library preparation. These primers targeted representative sequences of  
380 all 67 antibiotic resistant families and 662 ARGs.

381

## 382 **Library Prep**

383 Oligonucleotide primers were created in Illumina Design Studio and ordered through Illumina (Supp.  
384 Table 1). Paired-end libraries for each sample were prepared using the TruSeq Custom Amplicon Low  
385 Input Kit (Illumina) according to the manufacturer's instructions. This kit allows generation of up to  
386 1536 amplicon targets over 96 samples. All DNA was diluted to 10 ng/uL during library preparation, or  
387 prepared with no dilution where concentrations were less than 10 ng/uL. An Agilent High Sensitivity  
388 D1000 ScreenTape System (Agilent Technologies) was used for measuring DNA concentration of pre-  
389 pared libraries. For sequencing, the MiSeq Reagent Kit v2 (300-cycles) (Illumina) reagents were used  
390 with the MiSeq sequencing platform.

## 391 **Samples**

392

### 393 **Mock-community**

394 A mock-community composed of 20 cultured isolates<sup>28</sup> was created for purpose of assessing the  
395 effectiveness of DARTE-QM. Nineteen of the genomes were available from the NCBI GenBank, and a  
396 single genome was sequenced at the USDA Animal Research (Ames, Iowa) (Supp. Dataset 1). The  
397 ARGs found within the genomes were annotated using ResFam and also the Comprehensive Antibiotic

398 Resistance Database (CARD, version 2.0.1)<sup>29</sup>. We included 6 mock-community samples sequenced in  
399 triple replicates with 0, 0.0025, 0.009, 0.025, 0.12, 0.25 ng of the synthetic oligonucleotide reference.  
400  
401 To evaluate the practical implementation of DARTE-QM using environmental samples, we used 19  
402 environmental samples originating from intrinsic and manure-amended soils, swine manures, effluent  
403 from manure-amended soils, and swine fecal samples that passed quality filters. Samples were selected  
404 from two previously published studies. In the first study, laboratory soil columns and rainfall  
405 simulations were used to evaluate the influence of swine manure amendment on soils and effluent<sup>19</sup>  
406 (Supp. Table 4). In the second study, fecal samples from swine with varying antibiotic usage and routes  
407 of administration were used<sup>30</sup>. Samples from a subsequent laboratory soil column experiment designed  
408 to evaluate the influence of either swine or beef manure on soils and effluent were also included.  
409 Metagenomes were available for 14 samples (NCBI SRA database Bioproject PRJNA533779) were  
410 used for comparisons to DARTE-QM results.

411

## 412 **Data Analysis**

413

414 All analysis was done in the statistical language R, unless otherwise stated. DARTE-QM sequences  
415 were quality checked using FastQC (v0.11.9)<sup>31</sup> (Figure 1). Reads were demultiplexed by primer, which  
416 were identified and removed using Cutadapt (v2.10)<sup>32</sup> with an error tolerance of 0.1 and a phred-score  
417 quality threshold of 20<sup>32</sup>. High-quality paired-end reads were merged using PEAR (v0.9.8)<sup>33</sup>, requiring  
418 a minimum overlap of 10 bp. Merged reads were aligned against our database of targeted sequences  
419 using BLAST (v2.10)<sup>34</sup>. Successful alignment required a minimum of 90 bp and 98% similarity. For  
420 paired-end reads that were not able to be merged, each was aligned to the target-database individually.  
421 If both reads aligned to the same target, the read with the longest alignment was selected as the repre-

422 tentative sequence. We defined a successful amplification as a read for which a primer sequence was  
423 present, and the amplified sequence aligned to the primer's intended target with at least 90 bp length  
424 and at least 95% identity. Reads identified as having 16S rRNA primers were classified using the RDP  
425 Classifier<sup>35</sup> with default parameters, and then unpaired reads selected in the same manner as for ARGs.  
426  
427 Each read was classified as either true positive (TP), false positive (FP), false negative (FN), or true  
428 negative (TN). This classification was based on alignment to the ARG reference database, where reads  
429 were deemed to be TP when both the intended primer target and read sequence aligned to the same  
430 gene; FP when the primer target and the read sequence did not agree; FN when no primer was found  
431 but the read sequence was able to be aligned to a reference ARG; and TN reads were assigned as all  
432 reads within a sample assigned as TP outside of the primer in question, i.e., all reads that were correctly  
433 identified as not being the targeted read. Success for DARTE-QM was evaluated on three metrics: sen-  
434 sitivity ( $TP/[TP + FN]$ ), specificity ( $TN/[TN + FP]$ ), and accuracy ( $([TP + TN])/([TP + FN + TN + FP])$ )  
435 for each gene target (i.e., primer) and each sample.

436  
437 The ability of DARTE-QM to quantify ARG presence was tested by comparing observed counts of the  
438 synthetic oligonucleotide to the expected concentrations. Samples were normalized by rarefying to a  
439 sequence count of 5,000. Samples with a sequence count less than 5,000 were discarded. Alpha  
440 diversity, richness, of ARGs was calculated using Shannon's index. Principal coordinate analysis was  
441 conducted to evaluate the variations of resistome profile in samples. Based on the relative abundance of  
442 ARGs in each sample, Bray-Curtis distances were calculated for each pair of samples, and the first two  
443 components of the eigenvalue decomposition were plotted. Permutational multivariate analysis of  
444 variance (PERMANOVA) was used to identify the significant factors (e.g., experiments, source-

445 matrices) which contributed to the observed resistome variation. Cluster analysis was performed using  
446 k-means.

447

## 448 **Variant Analysis**

449

450 To evaluate the presence of gene sequence variants, the observations of variants were estimated for  
451 sequences associated with the *erm35* and *tetM* genes. The forward reads of sequences which aligned to  
452 the DARTE-QM gene targets were clustered at 97% sequence similarity with CD-HIT (v4.6.7)<sup>36</sup>.  
453 Clusters containing greater than ten sequences were considered in our results, with representative  
454 sequences for each cluster determined by CD-HIT. Alignment was performed and visualized with  
455 JalView using ClustalW (v2.11.1.3)<sup>37</sup>.

456

457

## 458 REFERENCES

459

- 460 1. PCAST. National action plan for combatting antibiotic-resistant bacteria. *Washington, DC White*  
461 *House* (2015).
- 462 2. WHO. Global action plan on antimicrobial resistance. *World Heal. Organ.* 1–28 (2017).
- 463 3. Nelson, R. E. *et al.* National Estimates of Healthcare Costs Associated With Multidrug-Resistant  
464 Bacterial Infections Among Hospitalized Patients in the United States. *Clin. Infect. Dis.* **72**, S17–  
465 S26 (2021).
- 466 4. Nowakiewicz, A. *et al.* A significant number of multi-drug resistant *Enterococcus faecalis* in  
467 wildlife animals; long-term consequences and new or known reservoirs of resistance? *Sci. Total*  
468 *Environ.* **705**, 135830 (2020).

- 469 5. Werner, G. *et al.* Antibiotic resistant enterococci—tales of a drug resistance gene trafficker. *Int.*  
470 *J. Med. Microbiol.* **303**, 360–379 (2013).
- 471 6. Ranjan, R., Rani, A., Metwally, A., McGee, H. S. & Perkins, D. L. Analysis of the microbiome:  
472 Advantages of whole genome shotgun versus 16S amplicon sequencing. *Biochem. Biophys. Res.*  
473 *Commun.* **469**, 967–977 (2016).
- 474 7. Quince, C., Walker, A. W., Simpson, J. T., Loman, N. J. & Segata, N. Shotgun metagenomics,  
475 from sampling to analysis. *Nat. Biotechnol.* **35**, 833–844 (2017).
- 476 8. Wommack, K. E., Bhavsar, J. & Ravel, J. Metagenomics: read length matters. *Appl. Environ.*  
477 *Microbiol.* **74**, 1453–1463 (2008).
- 478 9. Guitor, A. K. *et al.* Capturing the resistome: a targeted capture method to reveal antibiotic  
479 resistance determinants in metagenomes. *Antimicrob. Agents Chemother.* **64**, (2019).
- 480 10. Noyes, N. R. *et al.* Enrichment allows identification of diverse, rare elements in metagenomic  
481 resistome-virulome sequencing. *Microbiome* **5**, 1–13 (2017).
- 482 11. Caporaso, J. G. *et al.* Global patterns of 16S rRNA diversity at a depth of millions of sequences  
483 per sample. *Proc. Natl. Acad. Sci.* **108**, 4516–4522 (2011).
- 484 12. Beltrame, L. *et al.* Profiling cancer gene mutations in longitudinal epithelial ovarian cancer  
485 biopsies by targeted next-generation sequencing: a retrospective study. *Ann. Oncol.* **26**, 1363–  
486 1371 (2015).
- 487 13. Chen, R., Im, H. & Snyder, M. Whole-exome enrichment with the illumina truseq exome  
488 enrichment platform. *Cold Spring Harb. Protoc.* **2015**, pdb--prot084863 (2015).
- 489 14. Williams, E. L. *et al.* Performance evaluation of Sanger sequencing for the diagnosis of primary  
490 hyperoxaluria and comparison with targeted next generation sequencing. *Mol. Genet. \&*  
491 *genomic Med.* **3**, 69–78 (2015).
- 492 15. Wong, S. Q. *et al.* Assessing the clinical value of targeted massively parallel sequencing in a

- 493 longitudinal, prospective population-based study of cancer patients. *Br. J. Cancer* **112**, 1411–  
494 1420 (2015).
- 495 16. Bürgmann, H., Pesaro, M., Widmer, F. & Zeyer, J. A strategy for optimizing quality and quantity  
496 of DNA extracted from soil. *J. Microbiol. Methods* **45**, 7–20 (2001).
- 497 17. Flekna, G., Schneeweiss, W., Smulders, F. J. M., Wagner, M. & Hein, I. Real-time PCR method  
498 with statistical analysis to compare the potential of DNA isolation methods to remove PCR  
499 inhibitors from samples for diagnostic PCR. *Mol. Cell. Probes* **21**, 282–287 (2007).
- 500 18. Tebbe, C. C. & Vahjen, W. Interference of humic acids and DNA extracted directly from soil in  
501 detection and transformation of recombinant DNA from bacteria and a yeast. *Appl. Environ.*  
502 *Microbiol.* **59**, 2657–2665 (1993).
- 503 19. Smith, S. D. *et al.* Investigating the dispersal of antibiotic resistance associated genes from  
504 manure application to soil and drainage waters in simulated agricultural farmland systems. *PLoS*  
505 *One* **14**, 1–14 (2019).
- 506 20. Holman, D. B., Brunelle, B. W., Trachsel, J. & Allen, H. K. Meta-analysis to define a core  
507 microbiota in the swine gut. *MSystems* **2**, e00004--17 (2017).
- 508 21. Rawlings, D. E. & Tietze, E. Comparative biology of IncQ and IncQ-like plasmids. *Microbiol.*  
509 *Mol. Biol. Rev.* **65**, 481–496 (2001).
- 510 22. Rozwandowicz, M. *et al.* Plasmids carrying antimicrobial resistance genes in  
511 Enterobacteriaceae. *J. Antimicrob. Chemother.* **73**, 1121–1137 (2018).
- 512 23. Blainey, P. C. The future is now: single-cell genomics of bacteria and archaea. *FEMS Microbiol.*  
513 *Rev.* **37**, 407–427 (2013).
- 514 24. Lim, H. J., Choi, J.-H. & Son, A. Necessity of purification during bacterial DNA extraction with  
515 environmental soils. *Environ. Health Toxicol.* **32**, (2017).
- 516 25. Zankari, E. *et al.* Identification of acquired antimicrobial resistance genes. *J. Antimicrob.*

- 517            *Chemother.* **67**, 2640–2644 (2012).
- 518    26.    Gilbert, J. A., Jansson, J. K. & Knight, R. The Earth Microbiome project: successes and  
519            aspirations. *BMC Biol.* **12**, 69 (2014).
- 520    27.    Cole, J. R. *et al.* Ribosomal Database Project: Data and tools for high throughput rRNA analysis.  
521            *Nucleic Acids Res.* **42**, 633–642 (2014).
- 522    28.    Allen, H. K. *et al.* Pipeline for amplifying and analyzing amplicons of the V1--V3 region of the  
523            16S rRNA gene. *BMC Res. Notes* **9**, 380 (2016).
- 524    29.    Alcock, B. P. *et al.* CARD 2020: antibiotic resistome surveillance with the comprehensive  
525            antibiotic resistance database. *Nucleic Acids Res.* **48**, D517--D525 (2020).
- 526    30.    Ricker, N. *et al.* Toward antibiotic stewardship: Route of antibiotic administration impacts the  
527            microbiota and resistance gene diversity in swine feces. *Front. Vet. Sci.* **7**, (2020).
- 528    31.    Andrews, S. & others. FastQC: a quality control tool for high throughput sequence data. (2010).
- 529    32.    Martin, M. Cutadapt removes adapter sequences from high-throughput sequencing reads.  
530            *EMBnet. J.* **17**, 10–12 (2011).
- 531    33.    Zhang, J., Kobert, K., Flouri, T. & Stamatakis, A. PEAR: a fast and accurate Illumina Paired-End  
532            reAd mergeR. *Bioinformatics* **30**, 614–620 (2014).
- 533    34.    Altschul, S. F., Gish, W., Miller, W., Myers, E. W. & Lipman, D. J. Basic local alignment search  
534            tool. *J. Mol. Biol.* **215**, 403–410 (1990).
- 535    35.    Wang, Q., Garrity, G. M., Tiedje, J. M. & Cole, J. R. Naive Bayesian classifier for rapid  
536            assignment of rRNA sequences into the new bacterial taxonomy. *Appl. Environ. Microbiol.* **73**,  
537            5261–5267 (2007).
- 538    36.    Fu, L., Niu, B., Zhu, Z., Wu, S. & Li, W. CD-HIT: Accelerated for clustering the next-generation  
539            sequencing data. *Bioinformatics* **28**, 3150–3152 (2012).
- 540    37.    Waterhouse, A. M., Procter, J. B., Martin, D. M. A., Clamp, M. & Barton, G. J. Jalview Version

541 2—a multiple sequence alignment editor and analysis workbench. *Bioinformatics* **25**, 1189–1191  
542 (2009).

543

544

#### 545 ACKNOWLEDGEMENTS

546 This project was supported (or partially supported) by AFRI food safety grant no. 2016-68003-24604  
547 from the USDA National Institute of Food and Agriculture. We thank Jennifer Jones and Kathy Mou at  
548 the *ARS-USDA National Animal Disease Center* for their help with library preparation. We thank Jared  
549 Shelerud at Illumina for his help with the TruSeq Custom Amplicon platform.

550

#### 551 AUTHOR CONTRIBUTIONS

552 A.H., H.A., M.S., F.Y., N.R., and J.C. were designed the project; A.H. H.A., M.S., and S.H.-L. were  
553 involved in funding-acquisition; S.S. analyzed the data and wrote the manuscript with assistance from  
554 A.H. and N.R.

555

#### 556 COMPETING INTERESTS

557 The authors declare no competing interests.

558

559

#### 560 ADDITIONAL INFORMATION

561 Supplemental information

562

#### 563 CORRESPONDENCE

564 Correspondence to Adina Howe



565

566 PEER REVIEW INFORMATION

567

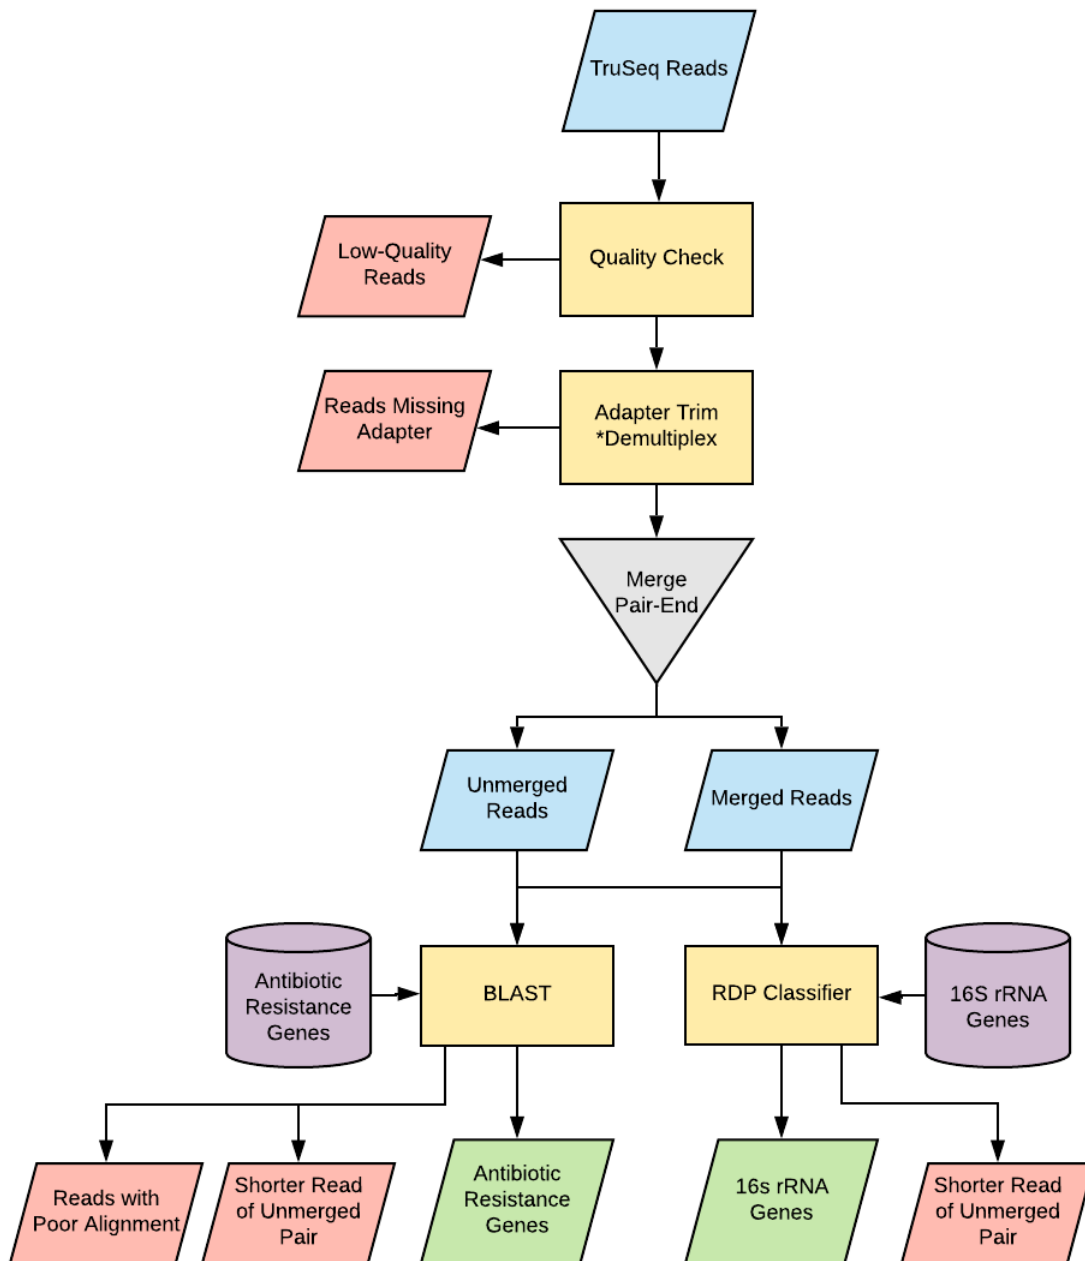

**Figure 1.** Summary of DARTE-QM read processing pipeline. Data-boxes color blue represent reads kept within the pipeline, red boxes were discarded reads, and green are the finalized reads for analysis. Reads were filtered by quality-score and demultiplexed by the presence of primer sequences. To classify ARGs, both merged and unmerged reads were required to align to known genes in ResFam and CARD ARG reference databases. In the case of unmerged reads, if both the forward and the reverse read aligned to the same target, the shorter alignment from the pair was discarded.

a

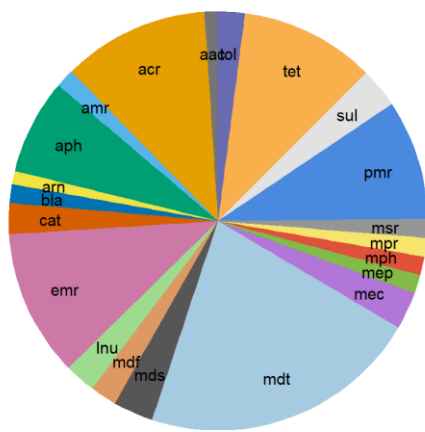

b

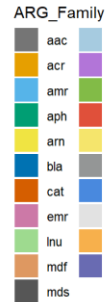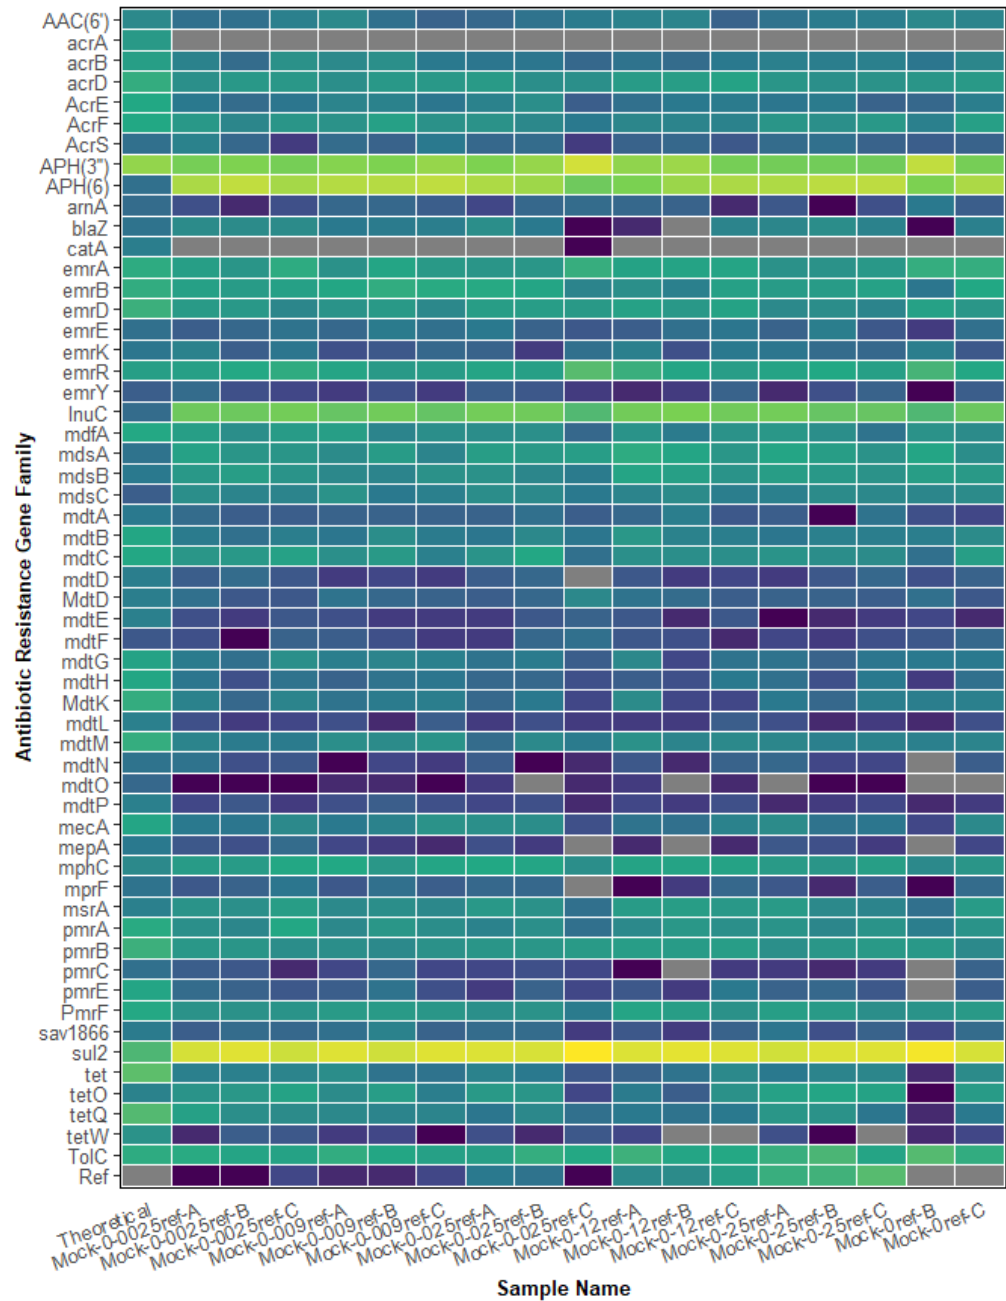

**Figure 2.** Presence and distribution of known ARGs within mock community samples. A.) Proportion of the resistome represented by each ARG Class. b.) Heatmap showing the log-transformed normalized abundance of each ARG Family from each mock sample, as well as the theoretical distribution.

Sample Name

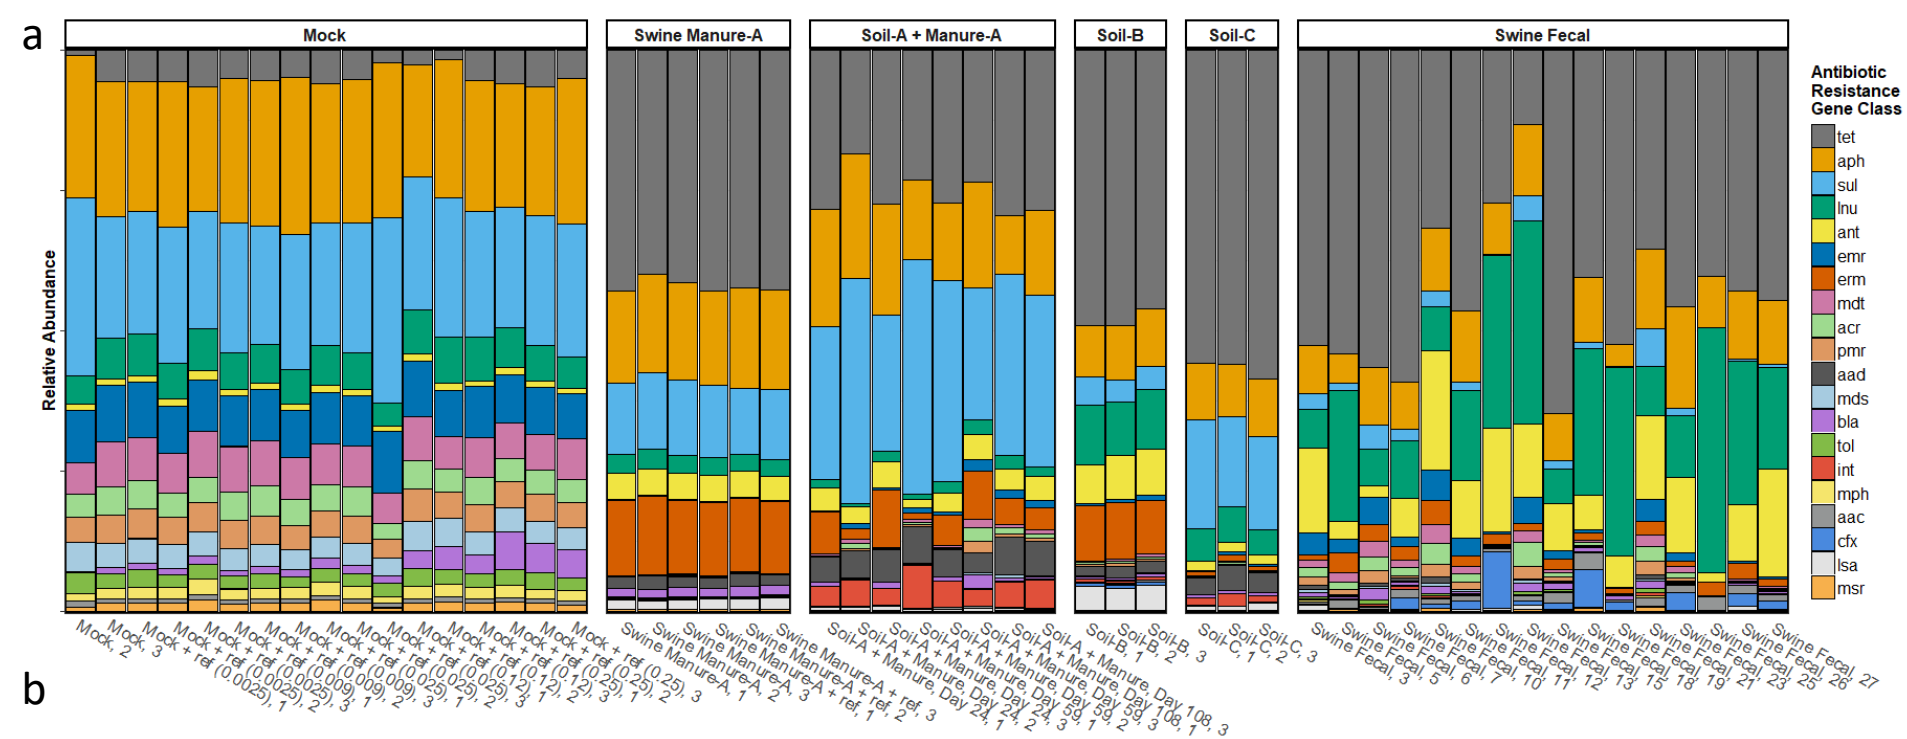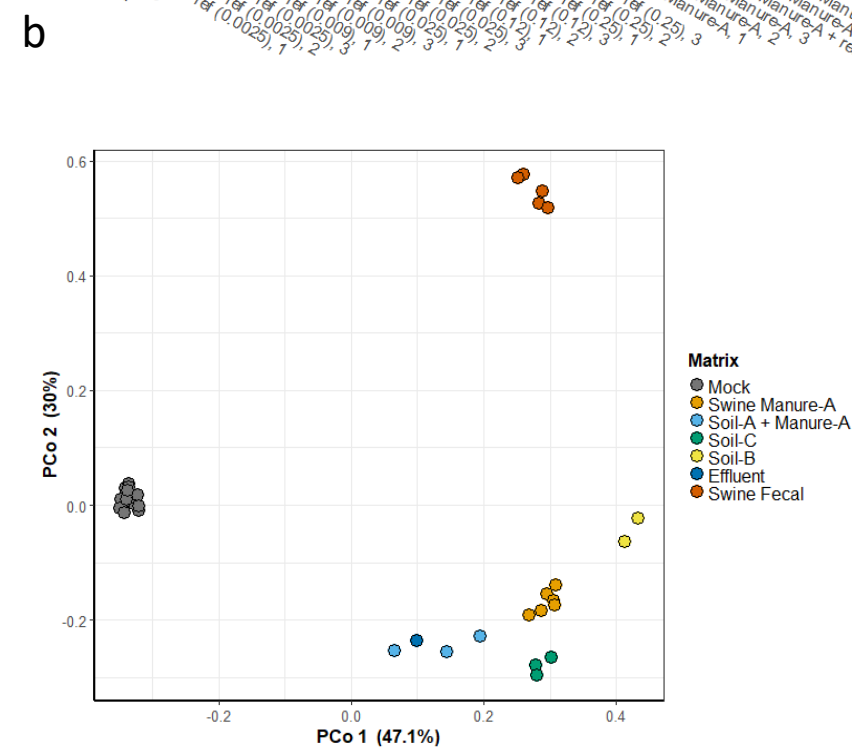

**Figure 3. ARG profiles by source matrix.** a) Relative abundance of ARG classes identified for all mock community, swine fecal, soil, swine manure, and manure-treated soils. b) Principal coordinate analysis based on Bray-Curtis distances of for resistomes, for samples passing all QC-filtering.

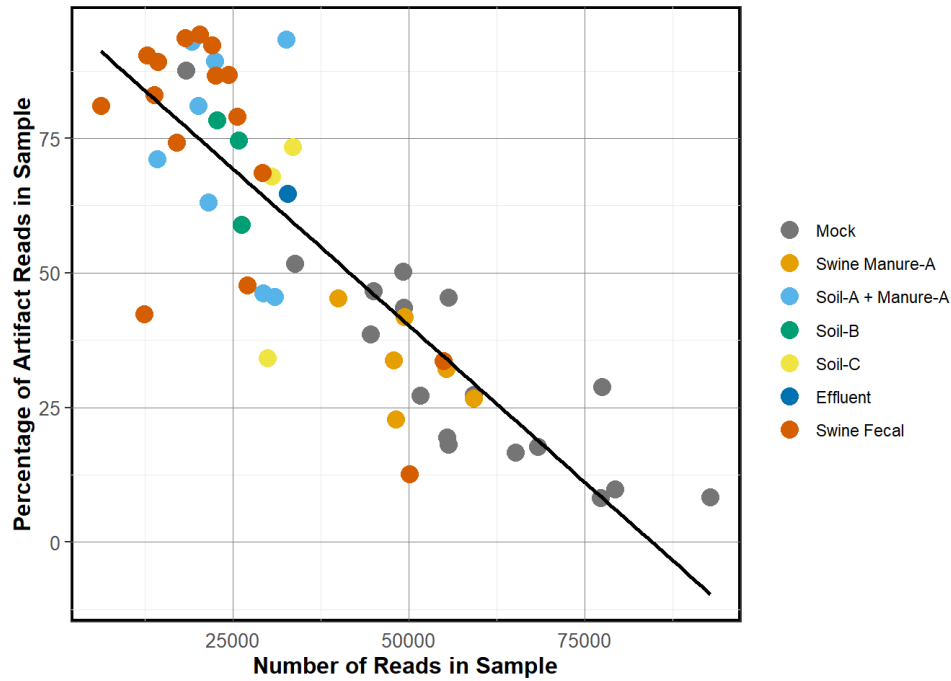

**Supp Figure 1.** Linear correlation of the percentage of artifact reads present in a sample to the total number of reads in the sample. Reads were defined as sequencing artifacts if a primer was located on the 5' end of the sequences and the read did not align to any of reference ARGs or any other location in the mock-community genomes. The percentage of sequencing artifacts observed was higher for environmental samples relative to mock community samples and was also inversely correlated ( $R^2 = 0.68$ ) to the number of reads in a sample.

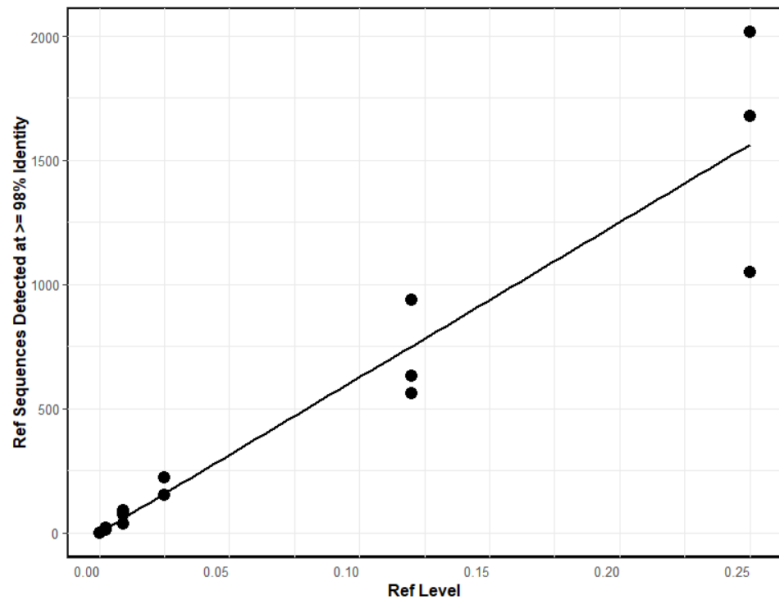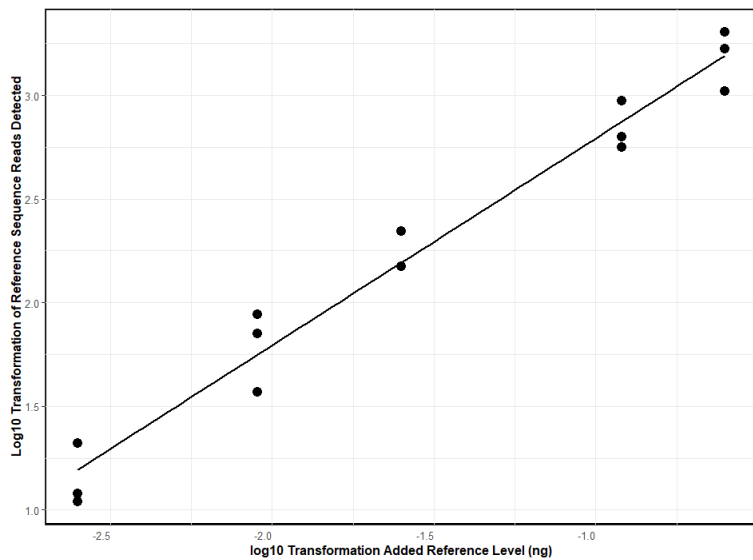

**Supp Figure 2.** Linear correlation between the concentration of the reference sequence added to mock community samples and the number of reads which aligned to the reference sequence. The linear model found there to be a strong correlation ( $R^2 = 0.91$ ), indicating DARTE-QM is sensitive to DNA quantity.

erm35\_C1/3-150  
 erm35\_C2/3-150  
 erm35\_C3/3-150  
 erm\_35\_target\_AF319779/1-148

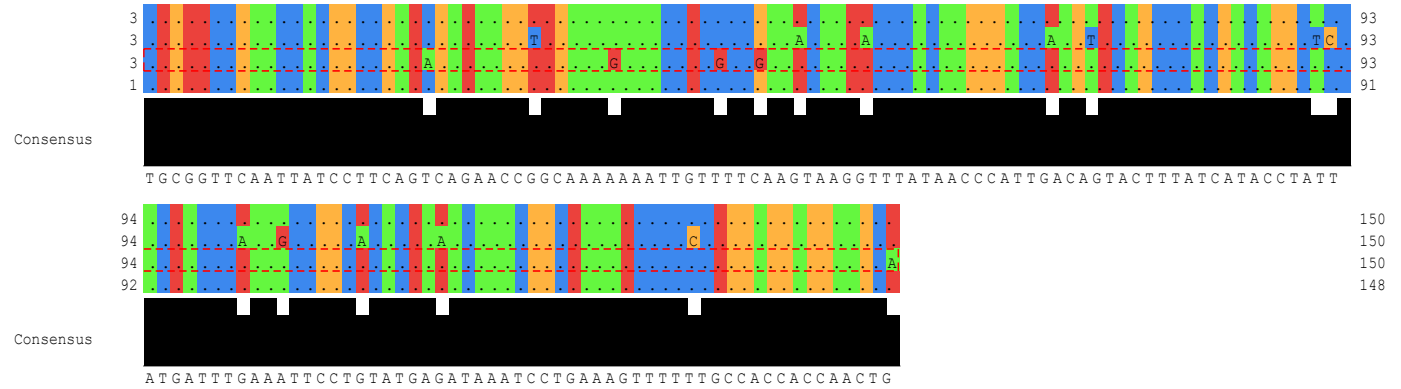

Supp Figure 3. a) Alignment of gene targets and sequences identified by DARTE-QM gene target for a) *erm35* and [continued on next slide]

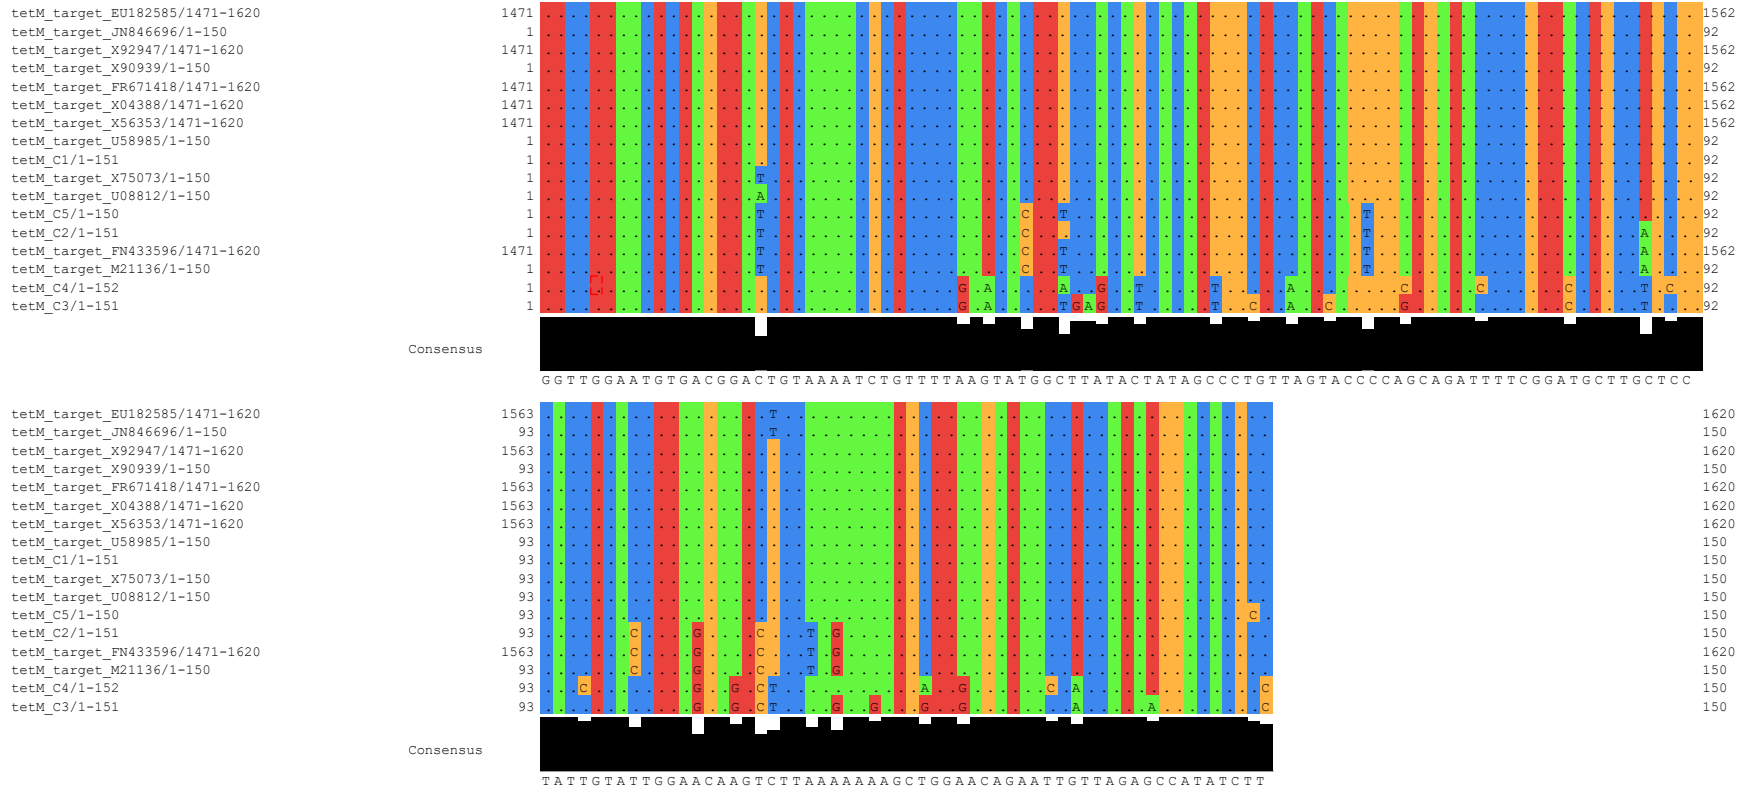

Supp Figure 3. b) *tetM* genes. Sequences are representative sequences identified for clusters of reads by 97% sequence identity (see also Supp. Table 7). The presence of gene variants are shown in the corresponding three clusters for *erm35* (*erm35\_C1-C3*) and five clusters for *tetM* (*tetM\_C1-C5*). Genes targeted by DARTE-QM are also shown.
